# Supplementary material for: A durable non-enzymatic electrochemical sensor for monitoring H2O2 in rat brain microdialysates based on one-step fabrication of hydrogels
Source: Royal Society of Chemistry journal article supplement (doi:10.1039/c4an02003k), 2014-11-25
Supplement: c4an02003k1.pdf [file c4an02003k1.pdf]

## **Supporting Information**

### **A facile and durable non-enzymatic electrochemical sensor for monitoring of cerebral H<sub>2</sub>O<sub>2</sub> based on one-step fabrication of hydrogel**

Zhen Wang<sup>†</sup>, Limin Zhang<sup>‡</sup>, and Yang Tian<sup>†‡</sup>

<sup>†</sup>Department of Chemistry, Tongji University, Siping Road 1239, Shanghai  
200092, China

<sup>‡</sup>Department of chemistry, East China Normal University, North Zhongshan  
Road 3663, Shanghai 200062, China.

E-mail: ytian@chem.ecnu.edu.cn; Fax: +86 21 62237105.

- 1. Optimization of GPTMS and TH concentrations**
- 2. Comparison of analytical performance of the present H<sub>2</sub>O<sub>2</sub> sensor with other sensors reported in literatures**

## 1. Optimization of GPTMS and TH concentrations

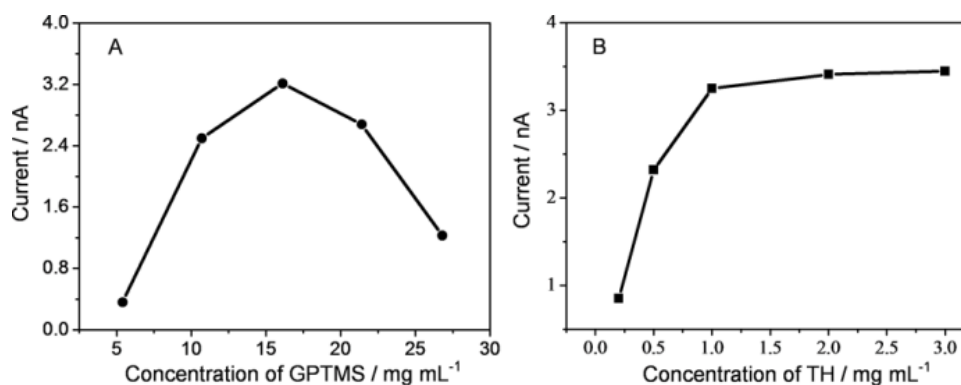

**Fig. S1.** Relationship between concentrations of GPTMS (A) and TH (B) on the peak currents of the CS/GPTMS/TH electrode toward  $5.0 \times 10^{-5}$  M  $\text{H}_2\text{O}_2$  in 0.1 M PBS (pH 7.0).

In our present work, we developed a facile method for  $\text{H}_2\text{O}_2$  detection using CS hydrogel as a matrix to immobilize the specific recognition – TH via one-step electrodeposition. The concentrations of GPTMS and TH were optimized and summarized in Fig. S1. As shown in Fig. S1A, the catalytic peak current of CS/GPTMS/TH electrode toward  $\text{H}_2\text{O}_2$  increased with the increasing concentration of GPTMS up to  $16.0 \text{ mg mL}^{-1}$ . Further increasing amount of GPTMS ( $>16.0 \text{ mg mL}^{-1}$ ) caused the dropping peak current. Thus, the concentration of GPTMS was optimized to  $16.0 \text{ mg mL}^{-1}$  for then studying the effect of TH concentration. From Fig. R1B, it can be seen that the current response of CS/GPTMS/TH toward  $\text{H}_2\text{O}_2$  gradually increased with the increasing concentration of TH and a maximum of current was obtained at TH concentration of  $1 \text{ mg mL}^{-1}$ . Therefore,  $16.0 \text{ mg mL}^{-1}$  GPTMS and  $1 \text{ mg mL}^{-1}$  TH was finally selected to construct the optimized CS/GPTMS/TH electrode.

---

## 2. Comparison of analytical performance of the present H<sub>2</sub>O<sub>2</sub> sensor with other sensors reported in literatures

**Table S1.** Comparison of analytical performance of the present H<sub>2</sub>O<sub>2</sub> sensor with that of other sensors reported in literatures.

| Sensor                           | Response time<br>(s) | Linear range<br>( $\mu$ M) | Detection limit<br>( $\mu$ M) | References       |
|----------------------------------|----------------------|----------------------------|-------------------------------|------------------|
| GCE/CS/GPTMS/TH                  | 7                    | 5-690                      | 1.0                           | the present work |
| GCE/SA-MWCNTs/Hb                 | 10                   | 40-200                     | 16.4                          | S1               |
| Au/CS/AuNPs/HRP                  | -                    | 8.0-120                    | 2.4                           | S2               |
| CPE/HRP/Si-Sol-gel/CS            | 10                   | 250-3400                   | 3.0                           | S3               |
| GCE/PPY/NiHCF                    | -                    | 100-900                    | 100                           | S4               |
| Au/HRP-ZrO <sub>2</sub>          | 10                   | 20-9450                    | 2.0                           | S5               |
| GCE/CMC-TiO <sub>2</sub> -NTs/Hb | 10                   | 4-64                       | 4.6                           | S6               |
| Au/MH/GelB/HHC/CCP               | -                    | 0-300                      | 10                            | S7               |

## References

- S1 H. Zhao, W. Zheng, Z. Meng, H. Zhou, X. Xu, Z. Li, Y. Zheng, *Biosens. Bioelectron.*, 2009, **24**, 2352-2357.
- S2 X. Luo, J. Xu, Q. Zhang, G. Yang, H. Chen, *Biosens. Bioelectron.*, 2005, **21**, 190-196.
- S3 Y. Miao, S.N. Tan, *Anal. Chim. Acta*, 2001, **437**, 87-93.
- S4 P. Fiorito, S. Cordoba de Torresi, *J. Electroanal. Chem.*, 2005, **581**, 31-37.
- S5 Z. Tong, R. Yuan, Y. Chai, Y. Xie, S. Chen, *J. Biotechnol.*, 2007, **128**, 567-575.
- S6 W. Zheng, Y. Zheng, K. Jin, N. Wang, *Talanta*, 2008, **74**, 1414-1419.
- S7 K. Wael, Q. Bashir, S. Vlierberghe, P. Dubruel, H. Heering, A. Adriaens, *Bioelectrochemistry*, 2010, **83**, 15-18.
